# Supplementary material for: Targetable Pathways for Alleviating Mitochondrial Dysfunction in Neurodegeneration of Metabolic and Non-Metabolic Diseases
Source: MDPI journal article supplement (doi:10.3390/ijms222111444), 2021-10-23
Supplement: s1 [file s1]

| Treatment           |                   | Targetable pathway              | Method of action                                                           | Effectiveness and Considerations                                                                                                                                                                                                                                                                                                                                                                                                                                          | Reference(s)                                   |
|---------------------|-------------------|---------------------------------|----------------------------------------------------------------------------|---------------------------------------------------------------------------------------------------------------------------------------------------------------------------------------------------------------------------------------------------------------------------------------------------------------------------------------------------------------------------------------------------------------------------------------------------------------------------|------------------------------------------------|
| Natural polyphenols | Resveratrol       | Induce mitochondrial biogenesis | Interaction with SIRT1 and AMPK via PGC1 $\alpha$                          | <ul style="list-style-type: none"> <li>Stimulates SIRT1-dependent upregulation of antioxidants in brain (SOD1+2, MnSOD, GPx, CAT).</li> <li>Promotes neuronal survival by inhibiting oxidative stress and preventing neuroinflammation.</li> <li>Improves oxidative function, increases mitochondrial biogenesis, MRC complex I and CS activity, ATP production, and decreases [lactate].</li> <li>Rapidly metabolised, low solubility and bioavailability.</li> </ul>    | [16] [46] [54] [105] [133] [138] [141] [186]   |
|                     | Curcumin          |                                 | Interaction with multiple signalling pathways (AMPK, SIRT1, Nrf2)          | <ul style="list-style-type: none"> <li>Favourable absorption, bioavailability and long half-life in the CNS.</li> <li>Amphiphilic nature makes it beneficial in neurologic disease patients due to high % of lipids in brain.</li> <li>Improves O<sub>2</sub> consumption rates, increases cell viability and <math>\Delta\Psi_m</math> in PINK1-deficient cells.</li> <li>Increases dopamine levels, reduces cytotoxicity and cell viability in SNpc neurons.</li> </ul> | [35] [50] [106] [117] [187]                    |
| Bioactive quinones  | CoQ <sub>10</sub> |                                 | Regulates mitochondrial activity via cAMP-AMPK-SIRT1-PGC1 $\alpha$ pathway | <ul style="list-style-type: none"> <li>Improves cognitive function, facilitates ATP synthesis and upregulates mitochondrial function.</li> </ul>                                                                                                                                                                                                                                                                                                                          | [2] [3] [30] [78] [86] [121] [131] [142] [189] |

|  |           |  |                                                                                                                                             |                                                                                                                                                                                                                                                                                                                                                                                                                                                                                                                                                                                   |                            |
|--|-----------|--|---------------------------------------------------------------------------------------------------------------------------------------------|-----------------------------------------------------------------------------------------------------------------------------------------------------------------------------------------------------------------------------------------------------------------------------------------------------------------------------------------------------------------------------------------------------------------------------------------------------------------------------------------------------------------------------------------------------------------------------------|----------------------------|
|  |           |  |                                                                                                                                             | <ul style="list-style-type: none"> <li>• Reduces ROS generation, preserves <math>\Delta\Psi_m</math>, increases [ATP], prevents mitochondrial membrane collapse.</li> <li>• Increases PGC1<math>\alpha</math> signalling.</li> <li>• Modulates mPTP inhibiting apoptosis.</li> <li>• Absorption and bioavailability are major determinants of the efficacy of CoQ<sub>10</sub> dietary supplementation.</li> <li>• Higher plasma concentrations are required in neurodegenerative diseases to produce a clinical response – large molecular weight and hydrophobicity.</li> </ul> |                            |
|  | PQQ       |  | Promotes phosphorylation of CREB, activating the PGC1 $\alpha$ promoter, increasing PGC1 $\alpha$ mRNA transcription and protein expression | <ul style="list-style-type: none"> <li>• Improves mitochondrial function, energy utilisation and longevity.</li> <li>• Inhibits apoptosis.</li> <li>• Provides protection from ROS.</li> <li>• Improves neurologic function and protects neurons from neurotoxicity.</li> <li>• Increases activation of NRF1+2.</li> <li>• Water-soluble and easily absorbed at low dietary concentrations.</li> </ul>                                                                                                                                                                            | [74] [153]                 |
|  | Idibenone |  | Directly transfers electrons to MRC complex III, bypassing MRC complex I and restoring cellular [ATP].                                      | <ul style="list-style-type: none"> <li>• Idibenone is rapidly absorbed following oral administration.</li> <li>• Poor water solubility and high lipophilicity which may impair its oral bioavailability.</li> <li>• Active in the CNS and capable of crossing the BBB.</li> <li>• Capable of inhibiting lipid peroxidation.</li> <li>• Improve and protect against MPTP-induced neuronal death.</li> </ul>                                                                                                                                                                        | [154] [155]<br>[156] [157] |

|                        |                     |  |                                                                                                       |                                                                                                                                                                                                                                                                                                                                                                                                                                                                                                                     |                                            |
|------------------------|---------------------|--|-------------------------------------------------------------------------------------------------------|---------------------------------------------------------------------------------------------------------------------------------------------------------------------------------------------------------------------------------------------------------------------------------------------------------------------------------------------------------------------------------------------------------------------------------------------------------------------------------------------------------------------|--------------------------------------------|
|                        |                     |  |                                                                                                       | <ul style="list-style-type: none"> <li>• Reduce PD associated neurological deficits.</li> </ul>                                                                                                                                                                                                                                                                                                                                                                                                                     |                                            |
| PPAR $\gamma$ agonists | Rosiglitazone       |  | Selective binding and activation of PPAR $\gamma$                                                     | <ul style="list-style-type: none"> <li>• Upregulate mitochondrial biogenesis, increase antioxidant defences (CAT, SOD) and transcription factors (PGC1<math>\alpha</math>, NRF1+2) and regulates autophagy.</li> <li>• Regulate Bcl-2 expression to maintain mitochondrial integrity by inhibiting apoptosis and cytochrome c release.</li> <li>• Inhibit cerebral oxidative damage and replenish ATP levels.</li> <li>• Associated with adverse outcomes – increased risk of heart failure and obesity.</li> </ul> | [43] [53]<br>[159] [160]<br>[161]<br>[162] |
|                        | Pioglitazone        |  | Selective activation of PPAR $\gamma$ 1+2 and PPAR $\alpha$                                           |                                                                                                                                                                                                                                                                                                                                                                                                                                                                                                                     |                                            |
|                        | Decanoic acid (C10) |  | Direct ligand of PPAR $\gamma$ . C10 binds and partially activates PPAR $\gamma$ .                    | <ul style="list-style-type: none"> <li>• Improves mitochondrial function and energy metabolism.</li> <li>• Increases neuronal mitochondrial content indicated by increasing MRC complex I and CAT activities.</li> <li>• A medium chain fatty acid – can efficiently cross the BBB.</li> <li>• Co-supplementation of C10 and C8 improves efficacy of C10 by reducing C10 metabolism via <math>\beta</math>-oxidation.</li> </ul>                                                                                    | [46] [94]<br>[103] [113]                   |
| Chrysin                |                     |  | Increases expression and transcriptional activity of Nrf2, promoting upregulation of Nrf2-ARE pathway | <ul style="list-style-type: none"> <li>• Overexpression of Nrf2, reverses dopaminergic neuronal loss in substantia nigra.</li> <li>• Oral supplementation of chrysin improves behavioural deficits, regulates MRC complex I, II, IV and V activities, diminishes oxidative stress markers, inhibits apoptosis</li> </ul>                                                                                                                                                                                            | [54] [129]<br>[170]                        |

|                            |       |                           |                                                                                                                                                                                           |                                                                                                                                                                                                                                                                                                                                                                                                                                                                                                                                                                             |                                                   |
|----------------------------|-------|---------------------------|-------------------------------------------------------------------------------------------------------------------------------------------------------------------------------------------|-----------------------------------------------------------------------------------------------------------------------------------------------------------------------------------------------------------------------------------------------------------------------------------------------------------------------------------------------------------------------------------------------------------------------------------------------------------------------------------------------------------------------------------------------------------------------------|---------------------------------------------------|
|                            |       | Activate Nrf2-ARE pathway |                                                                                                                                                                                           | <p>and increases cellular antioxidant status (SOD, CAT, GSH).</p> <ul style="list-style-type: none"> <li>• Low bioavailability, poor absorption and rapid metabolism.</li> <li>• Combined treatment with PCA can improve neuroprotective effects of chrysin and reduce oxidative stress.</li> </ul>                                                                                                                                                                                                                                                                         |                                                   |
| Fumaric acid esters (FAEs) | DMF   |                           | <p>Oxidises Keap-1 sulfhydryl (-SH) groups, resulting in dissociation of Keap-1 from Nrf2, leading to Nrf2 migration to the nucleus and inducing upregulation of Nrf2-dependent genes</p> | <ul style="list-style-type: none"> <li>• Target Nrf2 at basal ganglia and protect nigral dopaminergic neurons from <math>\alpha</math>-synuclein toxicity.</li> <li>• Increase nuclear levels of Nrf2 to increase cellular redox potential, GSH, ATP levels and <math>\Delta\Psi_m</math>.</li> <li>• Cytoprotective against oxidative stress-induced cellular injury and death.</li> <li>• Improve cell viability via upregulation of Nrf2-dependent antioxidant response.</li> <li>• Each FAE exhibits different biodistribution in neurodegenerative disease.</li> </ul> | <p>[34] [122]<br/>[137] [174]<br/>[175] [178]</p> |
| Deubiquitinases (DUBs)     | USP14 |                           | <p>Acts as a proteasome-associated DUB, releasing ubiquitin from the proteasome and targeting ubiquitinated proteins.</p>                                                                 | <ul style="list-style-type: none"> <li>• Induce mitophagy in absence of PINK1/parkin.</li> <li>• Pharmacological USP14 inhibition and/or KO restores mitochondrial function and increases mitochondrial clearance in neuronal cells.</li> <li>• USP30 KO rescues defective mitophagy and improves mitochondrial integrity in PINK1/parkin-deficient cells.</li> </ul>                                                                                                                                                                                                       | <p>[26] [71]<br/>[181] [183]<br/>[184] [185]</p>  |

|           |       |                              |                                                                                              |                                                                                                                                                                                                                                                                                                                                                                                                                                                        |                                   |
|-----------|-------|------------------------------|----------------------------------------------------------------------------------------------|--------------------------------------------------------------------------------------------------------------------------------------------------------------------------------------------------------------------------------------------------------------------------------------------------------------------------------------------------------------------------------------------------------------------------------------------------------|-----------------------------------|
|           | USP30 | Induces mitophagy/ autophagy | Negatively regulates mitophagy by removing ubiquitin from substrates ubiquitinated by Parkin | <ul style="list-style-type: none"> <li>Difficult to specifically target one DUB without affecting other DUBs due to several DUBs sharing the same structure and properties.</li> </ul>                                                                                                                                                                                                                                                                 |                                   |
| Trehalose |       |                              | Activates TFEB via Akt inhibition                                                            | <ul style="list-style-type: none"> <li>Inhibits oxidative stress-induced mitochondrial dysfunction via induction of mitophagy.</li> <li>Induces clearance of protein aggregates.</li> <li>Increases autophagy and GSH levels.</li> <li>Reduces dopaminergic cell death.</li> <li>Oral administration can target the brain – slowing down disease progression and improving behavioural disturbances and neuropathological features in LSDs.</li> </ul> | [74] [87]<br>[107] [149]<br>[162] |

**Table S1. Summary of therapeutic strategies capable of alleviating mitochondrial dysfunction in neurodegeneration.** The pathway targeted, mechanism of action and effectiveness and considerations of each of the therapeutic candidates have been considered.

SIRT1 – sirtuin 1; AMPK – AMP-dependent kinase; PGC1 $\alpha$  - Peroxisome proliferator-activated receptor gamma coactivator 1-alpha; SOD – superoxide dismutase; MnSOD – manganese superoxide dismutase; GPx – glutathione peroxidase; GSH – glutathione; CAT - catalase; OS – oxidative stress; MRC – mitochondrial respiratory chain; CS – citrate synthase; ATP – adenosine triphosphate; Nrf2 - Nuclear factor erythroid 2-related factor; CNS – central nervous system;  $\Delta\Psi_m$  – mitochondrial membrane potential; PINK1 – PTEN-induced kinase 1; SNpc – Substantia nigra pars compacta; cAMP – cyclic adenosine monophosphate; ROS – reactive oxygen species; CoQ<sub>10</sub> - Coenzyme Q<sub>10</sub>; PQQ - Pyrroloquinoline quinone; CREB – cAMP response element-binding protein; mRNA – messenger RNA; NRF1 - Nuclear respiratory factor 1; PPAR $\gamma$  - Peroxisome proliferator-activated receptor gamma; Bcl-2 - B-cell lymphoma 2; TZDs – Thiazolidinediones; BBB – blood brain barrier; C8 – octanoic acid; C10 – decanoic acid; ARE – antioxidant-responsive element; PCA - Protocatechuic acid; Keap1 - Kelch-like ECH-associated protein 1; FAEs – fumaric acid esters; DUBs – Deubiquitinases – TFEB - Transcription factor EB; Akt – Protein kinase B; USP14/30 - Ubiquitin-specific peptidase 14/30; KO – knockout; LSDs – lysosomal storage disorders.
